# Supplementary material for: Review article: Terrestrial dissolved organic carbon in northern permafrost
Source: Copernicus journal article supplement (doi:10.5194/tc-18-1443-2024), 2024-03-28
Supplement: Supplementary file 1 [file tc-18-1443-2024-supplement.pdf]

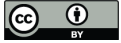

*Supplement of*

**Review article: Terrestrial dissolved organic carbon in northern permafrost**

**Liam Heffernan et al.**

*Correspondence to:* Liam Heffernan (w.heffernan@vu.nl)

The copyright of individual parts of the supplement might differ from the article licence.

Table S1. Categorical variables included in the database for analysis

| Permafrost Zone | EcoRegion          | Permafrost Conditions | Thermal Horizon | Disturbance Type        | Soil Class | Ecosystem Type           | Extraction Method  | Measurement Method |
|-----------------|--------------------|-----------------------|-----------------|-------------------------|------------|--------------------------|--------------------|--------------------|
| Continuous      | Arctic tundra      | Present               | Active layer    | Fire                    | Histosol   | Coastal tundra           | Centrifugation     |                    |
| Discontinuous   | Sub-arctic tundra  | Absent                | Permafrost lens | Active layer thickening | Histel     | Forest                   | Leaching           |                    |
| Sporadic        | Sub-arctic boreal  |                       | Permafrost free | Thermokarst terrestrial | Orthel     | Peatland                 | Dry leaching       |                    |
| Permafrost free | Continental boreal |                       | Water           | Thermokarst aquatic     | Turbel     | Permafrost bog           | Dialysis           |                    |
|                 |                    |                       | Thaw stream     |                         |            | Permafrost wetland       | Grab               |                    |
|                 |                    |                       |                 |                         |            | Retrogressive thaw slump | Ice core           |                    |
|                 |                    |                       |                 |                         |            | Upland tundra            | Potassium sulphate |                    |
|                 |                    |                       |                 |                         |            | Yedoma                   | Lysimeter          |                    |
|                 |                    |                       |                 |                         |            |                          | Piezometer         |                    |
|                 |                    |                       |                 |                         |            |                          | Pump               |                    |
|                 |                    |                       |                 |                         |            |                          | Rhizon             |                    |

Table S2. Number of studies, DOC concentrations, and country location for each ecosystem type. Total number of studies in table is greater than number of studies in the database as some studies have sites at multiple ecosystem types

| <b>Ecosystem</b>         | <b>No. of studies</b> | <b>No. of DOC measurements</b> | <b>Study location</b>        |
|--------------------------|-----------------------|--------------------------------|------------------------------|
| Peatland                 | 7                     | 48                             | Can, Swe, USA                |
| Permafrost bog           | 37                    | 721                            | Can, Fin, Rus, Swe, USA      |
| Permafrost wetland       | 20                    | 478                            | Can, Gre, Rus, USA           |
| Forest                   | 20                    | 332                            | Can, Rus, Swe, USA           |
| Upland tundra            | 22                    | 527                            | Can, Gre, Rus, Sva, Swe, USA |
| Retrogressive thaw slump | 7                     | 175                            | Can, USA                     |
| Coastal tundra           | 9                     | 414                            | Can, USA                     |
| Yedoma                   | 9                     | 145                            | Can, Rus, USA                |

Can = Canada; Fin = Finland; Gre = Greenland; Rus = Russia; Sva = Svalbard; Swe = Sweden; USA = USA (Alaska)

Table S3. Dissolved organic carbon concentrations (DOC) and number of DOC measurements and number of studies they were taken from using the three main filter sizes used (0.22, 0.45, and 0.7  $\mu\text{m}$ ) to determine DOC concentrations corresponding to the violin plots from permafrost zones, ecoregions, soil class, and thermal horizon from Figure 2 in main text. DOC = median DOC concentration ( $\text{mg L}^{-1}$ )  $\pm$  the interquartile range. N = the number outside the parentheses represents DOC measurements and the number inside the parentheses represents the number of studies.

|                        | 0.22 $\mu\text{m}$ |          | 0.45 $\mu\text{m}$ |          | 0.7 $\mu\text{m}$ |          |
|------------------------|--------------------|----------|--------------------|----------|-------------------|----------|
|                        | DOC                | N        | DOC                | N        | DOC               | N        |
| <b>Permafrost zone</b> |                    |          |                    |          |                   |          |
| Continuous             | 42.9 $\pm$ 52.3    | 322 (8)  | 38.6 $\pm$ 82.5    | 710 (32) | 15.1 $\pm$ 86.6   | 562 (16) |
| Discontinuous          | 22.6 $\pm$ 47.8    | 28 (6)   | 57.1 $\pm$ 58.0    | 578 (30) | 42.1 $\pm$ 59.7   | 68 (10)  |
| Sporadic               |                    |          | 66.2 $\pm$ 146.8   | 81 (3)   | 29.6 $\pm$ 5.0    | 2 (1)    |
| <b>EcoRegion</b>       |                    |          |                    |          |                   |          |
| Arctic Tundra          | 30.9 $\pm$ 36.5    | 130 (4)  | 39.6 $\pm$ 89.1    | 501 (22) | 15.8 $\pm$ 89.4   | 466 (10) |
| Sub-Arctic Tundra      | 51.7 $\pm$ 42.2    | 154 (5)  | 41.0 $\pm$ 72.1    | 209 (10) | 11.4 $\pm$ 20.1   | 76 (5)   |
| Continental Boreal     | 38.6 $\pm$ 161.6   | 55 (3)   | 56.8 $\pm$ 43.6    | 319 (15) | 16.6 $\pm$ 15.1   | 15 (4)   |
| Sub-Arctic Boreal      | 19.9 $\pm$ 48.4    | 11 (2)   | 59.7 $\pm$ 89.8    | 340 (18) | 46.1 $\pm$ 63.3   | 75 (8)   |
| <b>Soil Class</b>      |                    |          |                    |          |                   |          |
| Turbel                 | 46.2 $\pm$ 52.1    | 287 (6)  | 52.8 $\pm$ 87.2    | 294 (15) | 8.3 $\pm$ 9.8     | 237 (11) |
| Othel                  | 19.1 $\pm$ 24.4    | 31 (2)   | 26.7 $\pm$ 66.3    | 388 (18) | 84.6 $\pm$ 128.2  | 259 (9)  |
| Histel                 | 23.2 $\pm$ 34.2    | 32 (7)   | 59.2 $\pm$ 76.6    | 652 (27) | 9.7 $\pm$ 51.8    | 134 (8)  |
| Histosol               |                    |          | 61.6 $\pm$ 39.4    | 35 (4)   | 34.3 $\pm$ 3.5    | 2 (1)    |
| <b>Thermal Horizon</b> |                    |          |                    |          |                   |          |
| Active Layer           | 42.7 $\pm$ 58.1    | 188 (12) | 53.7 $\pm$ 78.2    | 858 (45) | 28.3 $\pm$ 85.9   | 186 (12) |
| Permafrost Lens        | 63.6 $\pm$ 80.4    | 78 (7)   | 24.4 $\pm$ 110.2   | 372 (18) | 18.6 $\pm$ 122.4  | 279 (5)  |
| Thaw Stream            | 25.6 $\pm$ 19.3    | 78 (1)   |                    |          | 10.4 $\pm$ 10.9   | 122 (7)  |
| Permafrost Free        | 67.6 $\pm$ 65.8    | 6 (2)    | 56.8 $\pm$ 14.7    | 139 (7)  | 41.6 $\pm$ 54.7   | 45 (7)   |

Table S4. Dissolved organic carbon concentrations (DOC; mg L<sup>-1</sup>) and number of DOC measurements and number of studies they were taken from using the three main filter sizes used (0.22, 0.45, and 0.7 μm) to determine DOC concentrations corresponding to the boxplots showing DOC concentrations found across ecosystems in Figure 3 in main text. DOC = median DOC concentration (mg L<sup>-1</sup>) ± the interquartile range. N = the number outside the parentheses represents DOC measurements and the number inside the parentheses represents the number of studies.

| Ecosystem          | 0.22 μm      |         | 0.45 μm     |          | 0.7 μm       |         |
|--------------------|--------------|---------|-------------|----------|--------------|---------|
|                    | DOC          | N       | DOC         | N        | DOC          | N       |
| Yedoma             |              |         | 20.8 ± 40.8 | 22 (5)   | 8.2 ± 10.8   | 96 (4)  |
| Coastal tundra     | 52.0 ± 123.1 | 13 (2)  | 37.7 ± 79.5 | 232 (5)  | 109.6 ± 95.5 | 154 (3) |
| RTS                | 25.6 ± 19.3  | 78 (1)  | 23.4 ± 21.4 | 4 (1)    | 7.8 ± 8.6    | 113 (7) |
| Upland tundra      | 50.8 ± 39.5  | 147 (2) | 21.1 ± 67.3 | 275 (9)  | 10.8 ± 8.2   | 49 (6)  |
| Forest             | 41.6 ± 183.1 | 51 (3)  | 54.8 ± 63.7 | 138 (12) | 27.4 ± 51.9  | 9 (4)   |
| Permafrost wetland | 64.1 ± 109.7 | 33 (2)  | 45.2 ± 54.8 | 109 (10) | 16.6 ± 71.9  | 154 (4) |
| Permafrost bog     | 22.7 ± 53.6  | 21 (6)  | 64.1 ± 81.8 | 554 (19) | 48.1 ± 53.9  | 55 (6)  |
| Peatland           | 8.9          | 1 (1)   | 61.6 ± 39.4 | 35 (4)   | 34.3 ± 3.5   | 2 (1)   |

Table S5. Dissolved organic carbon concentrations (DOC) and number of DOC measurements and number of studies they were taken from using the three main DOC extraction methods (Leaching, Suction, and Grab) corresponding to the violin plots from permafrost zones, ecoregions, soil class, and thermal horizon from Figure 2 in main text. DOC = median DOC concentration ( $\text{mg L}^{-1}$ )  $\pm$  the interquartile range. N = the number outside the parentheses represents DOC measurements and the number inside the parentheses represents the number of studies. Type identifies whether DOC was extracted from either soil or water samples, and both represents all DOC concentrations using that extraction approach.

| Type                   |       | Leaching         |          | Suction          |          | Grab             |          |
|------------------------|-------|------------------|----------|------------------|----------|------------------|----------|
|                        |       | DOC              | N        | DOC              | N        | DOC              | N        |
| <b>Permafrost Zone</b> |       |                  |          |                  |          |                  |          |
| Continuous             | Both  |                  |          | 41.6 $\pm$ 73.3  | 676 (21) |                  |          |
|                        | Soil  | 41.0 $\pm$ 103.7 | 635 (27) | 75.8 $\pm$ 86.2  | 304 (5)  |                  |          |
|                        | Water |                  |          | 20.8 $\pm$ 32.9  | 372 (16) | 11.4 $\pm$ 18.2  | 311 (13) |
| Dis-continuous         | Both  |                  |          | 56.6 $\pm$ 52.3  | 383 (15) |                  |          |
|                        | Soil  | 57.7 $\pm$ 107.4 | 222 (19) | 65.0 $\pm$ 13.4  | 36 (1)   |                  |          |
|                        | Water |                  |          | 55.3 $\pm$ 59.9  | 347 (14) | 39.4 $\pm$ 47.1  | 32 (7)   |
| Sporadic               | Both  |                  |          |                  |          |                  |          |
|                        | Soil  | 66.2 $\pm$ 146.8 | 81 (3)   |                  |          |                  |          |
|                        | Water |                  |          |                  |          | 29.6 $\pm$ 5.0   | 2 (1)    |
| <b>EcoRegion</b>       |       |                  |          |                  |          |                  |          |
| Arctic Tundra          | Both  |                  |          | 26.4 $\pm$ 80.6  | 555 (16) |                  |          |
|                        | Soil  | 41.7 $\pm$ 99.2  | 395 (18) | 114.8 $\pm$ 97.4 | 155 (3)  |                  |          |
|                        | Water |                  |          | 11.9 $\pm$ 30.7  | 400 (13) | 11.2 $\pm$ 19.9  | 249 (6)  |
| Sub-Arctic Tundra      | Both  |                  |          | 57.5 $\pm$ 35.9  | 194 (5)  |                  |          |
|                        | Soil  | 34.9 $\pm$ 96.4  | 193 (9)  | 55.6 $\pm$ 35.9  | 185 (3)  |                  |          |
|                        | Water |                  |          | 97.9 $\pm$ 149.7 | 9 (2)    | 10.9 $\pm$ 9.9   | 52 (5)   |
| Continental Boreal     | Both  |                  |          |                  |          |                  |          |
|                        | Soil  | 63.0 $\pm$ 152.9 | 185 (10) |                  |          |                  |          |
|                        | Water |                  |          | 55.0 $\pm$ 21.7  | 182 (8)  | 31.6 $\pm$ 44.6  | 22 (4)   |
| Sub-Arctic Boreal      | Both  |                  |          |                  |          |                  |          |
|                        | Soil  | 57.3 $\pm$ 102.1 | 165 (11) |                  |          |                  |          |
|                        | Water |                  |          | 70.7 $\pm$ 62.0  | 128 (8)  | 64.0 $\pm$ 138.8 | 22 (6)   |
| <b>Soil Class</b>      |       |                  |          |                  |          |                  |          |
| Turbel                 | Both  |                  |          | 45.5 $\pm$ 57.2  | 323 (7)  |                  |          |
|                        | Soil  | 50.6 $\pm$ 102.0 | 259 (13) | 53.5 $\pm$ 40.1  | 152 (3)  |                  |          |

|          |       |                  |          |                  |          |                 |          |
|----------|-------|------------------|----------|------------------|----------|-----------------|----------|
|          | Water |                  |          | $31.0 \pm 65.4$  | 171 (4)  | $8.9 \pm 9.7$   | 225 (11) |
| Orthel   | Both  |                  |          | $55.0 \pm 94.8$  | 280 (12) |                 |          |
|          | Soil  | $23.2 \pm 80.8$  | 353 (16) | $106.1 \pm 92.8$ | 157 (3)  |                 |          |
|          | Water |                  |          | $21.8 \pm 29.6$  | 123 (9)  | $37.3 \pm 93.6$ | 97 (4)   |
| Histel   | Both  |                  |          | $49.1 \pm 58.1$  | 428 (20) |                 |          |
|          | Soil  | $74.9 \pm 125.1$ | 321 (18) | $64.3 \pm 13.4$  | 31 (2)   |                 |          |
|          | Water |                  |          | $47.1 \pm 57.5$  | 397 (18) | $64.0 \pm 35.8$ | 19 (4)   |
| Histosol | Both  |                  |          |                  |          |                 |          |
|          | Soil  | $72.5 \pm 36.3$  | 5 (2)    |                  |          |                 |          |
|          | Water |                  |          | $62.2 \pm 23.7$  | 28 (2)   | $7.2 \pm 2.6$   | 4 (1)    |

### Thermal Horizon

|                 |       |                  |          |                   |          |                 |         |
|-----------------|-------|------------------|----------|-------------------|----------|-----------------|---------|
| Active Layer    | Both  |                  |          | $36.5 \pm 59.4$   | 735 (29) |                 |         |
|                 | Soil  | $61.0 \pm 107.1$ | 545 (36) | $63.1 \pm 43$     | 205 (5)  |                 |         |
|                 | Water |                  |          | $21.0 \pm 48.6$   | 530 (24) | $62.3 \pm 34.6$ | 25 (5)  |
| Permafrost Lens | Both  |                  |          | $113.1 \pm 108.2$ | 139 (5)  |                 |         |
|                 | Soil  | $33.4 \pm 134.1$ | 303 (14) | $115.7 \pm 102.3$ | 135 (3)  |                 |         |
|                 | Water |                  |          | $16.3 \pm 10.0$   | 4 (2)    | $12.9 \pm 24.1$ | 198 (5) |
| Thaw Stream     | Both  |                  |          |                   |          |                 |         |
|                 | Soil  | $24.6 \pm 19.7$  | 84 (2)   |                   |          |                 |         |
|                 | Water |                  |          |                   |          | $10.5 \pm 12.3$ | 118 (7) |
| Permafrost Free | Both  |                  |          |                   |          |                 |         |
|                 | Soil  | $55.1 \pm 41.1$  | 6 (3)    |                   |          |                 |         |
|                 | Water |                  |          | $57.4 \pm 20.3$   | 185 (10) | $7.2 \pm 2.6$   | 4 (1)   |

Table S6. Dissolved organic carbon concentrations (DOC; mg L<sup>-1</sup>) and number of DOC measurements and number of studies they were taken from using the three main DOC extraction methods (Leaching, Suction, and Grab) corresponding to the boxplots showing DOC concentrations found across ecosystems in Figure 3 in main text. DOC = median DOC concentration (mg L<sup>-1</sup>) ± the interquartile range. N = the number outside the parentheses represents DOC measurements and the number inside the parentheses represents the number of studies. Type identifies whether DOC was extracted from either soil or water samples, and both represents all DOC concentrations using that extraction approach.

| Ecosystem          | Phase | Leaching      |          | Suction      |          | Grab         |        |
|--------------------|-------|---------------|----------|--------------|----------|--------------|--------|
|                    |       | DOC           | N        | DOC          | N        | DOC          | N      |
| Yedoma             | Both  |               |          |              |          |              |        |
|                    | Soil  | 9.1 ± 15.4    | 14 (1)   |              |          |              |        |
|                    | Water |               |          |              |          | 8.8 ± 11.9   | 91 (5) |
| Coastal tundra     | Both  |               |          | 66.7 ± 105.1 | 345 (5)  |              |        |
|                    | Soil  | 105.7 ± 230.0 | 45 (5)   | 115.7 ± 97.7 | 153 (2)  |              |        |
|                    | Water |               |          | 35.3 ± 56.9  | 192 (3)  | 0.7 ± 1.6    | 9 (1)  |
| RTS                | Both  |               |          |              |          |              |        |
|                    | Soil  | 24.0 ± 20.6   | 97 (3)   |              |          |              |        |
|                    | Water |               |          |              |          | 8.0 ± 7.8    | 98 (7) |
| Upland tundra      | Both  |               |          | 41.9 ± 50.7  | 219 (8)  |              |        |
|                    | Soil  | 22.2 ± 80.9   | 263 (8)  | 51.0 ± 38.8  | 163 (4)  |              |        |
|                    | Water |               |          | 6.7 ± 7.2    | 56 (4)   | 10.8 ± 7.9   | 47 (4) |
| Forest             | Both  |               |          |              |          |              |        |
|                    | Soil  | 65.5 ± 103.1  | 143 (11) |              |          |              |        |
|                    | Water |               |          | 25.4 ± 29.7  | 50 (6)   | 48.1 ± 30.1  | 5 (2)  |
| Permafrost wetland | Both  |               |          |              |          |              |        |
|                    | Soil  | 72.6 ± 108.2  | 84 (7)   |              |          |              |        |
|                    | Water |               |          | 7.3 ± 11.3   | 183 (8)  | 51.6 ± 133.7 | 74 (3) |
| Permafrost bog     | Both  |               |          | 61.4 ± 25.7  | 234 (11) |              |        |
|                    | Soil  | 81.9 ± 133.7  | 286 (14) | 65.9 ± 10.5  | 24 (1)   |              |        |
|                    | Water |               |          | 59.6 ± 29.8  | 210 (10) | 64.0 ± 22.2  | 17 (3) |
| Peatland           | Both  |               |          |              |          |              |        |
|                    | Soil  | 55.1 ± 41.1   | 6 (3)    |              |          |              |        |
|                    | Water |               |          | 62.2 ± 23.7  | 28 (2)   | 7.2 ± 2.6    | 4 (1)  |



Table S7. Dissolved organic carbon concentrations (DOC) and number of DOC measurements and number of studies they were taken from using the three main DOC analysis methods used (Combustion, Persulphate, Photometric) to determine DOC concentrations corresponding to the violin plots from permafrost zones, ecoregions, soil class, and thermal horizon from Figure 2 in main text. DOC = median DOC concentration ( $\text{mg L}^{-1}$ )  $\pm$  the interquartile range. N = the number outside the parentheses represents DOC measurements and the number inside the parentheses represents the number of studies.

|                        | Combustion       |           | Persulphate      |         | Photometric     |        |
|------------------------|------------------|-----------|------------------|---------|-----------------|--------|
|                        | DOC              | N         | DOC              | N       | DOC             | N      |
| <b>Permafrost zone</b> |                  |           |                  |         |                 |        |
| Continuous             | 27.3 $\pm$ 68.2  | 1372 (56) | 116.1 $\pm$ 94.5 | 143 (1) | 47.7 $\pm$ 28.4 | 31 (4) |
| Discontinuous          | 52.9 $\pm$ 59.6  | 709 (41)  | 66.8 $\pm$ 71.2  | 87 (8)  |                 |        |
| Sporadic               | 62.0 $\pm$ 143.9 | 83 (4)    |                  |         |                 |        |
| <b>EcoRegion</b>       |                  |           |                  |         |                 |        |
| Arctic Tundra          | 19.3 $\pm$ 57.6  | 954 (36)  | 116.1 $\pm$ 94.5 | 143 (1) | 71.5 $\pm$ 54.4 | 10 (1) |
| Sub-Arctic Tundra      | 42.5 $\pm$ 49.7  | 489 (24)  | 105.6 $\pm$ 1.6  | 4 (1)   | 40.1 $\pm$ 25.3 | 21 (3) |
| Continental Boreal     | 56.9 $\pm$ 58.5  | 360 (17)  | 14.8 $\pm$ 7.7   | 4 (1)   |                 |        |
| Sub-Arctic Boreal      | 56.7 $\pm$ 86.2  | 361 (24)  | 66.8 $\pm$ 69.2  | 79 (6)  |                 |        |
| <b>Soil Class</b>      |                  |           |                  |         |                 |        |
| Turbel                 | 34.5 $\pm$ 68.8  | 708 (30)  | 19.6 $\pm$ 38.1  | 11 (2)  |                 |        |
| Othel                  | 22.8 $\pm$ 64.7  | 556 (26)  | 110.9 $\pm$ 94.9 | 152 (4) | 47.7 $\pm$ 28.4 | 31 (4) |
| Histel                 | 50.4 $\pm$ 69.2  | 863 (45)  | 76.6 $\pm$ 61.4  | 67 (4)  |                 |        |
| Histosol               | 60.9 $\pm$ 38.7  | 37 (5)    |                  |         |                 |        |
| <b>Thermal Horizon</b> |                  |           |                  |         |                 |        |
| Active Layer           | 41.7 $\pm$ 74.3  | 1122 (65) | 79.4 $\pm$ 61.4  | 139 (8) | 47.7 $\pm$ 28.4 | 31 (4) |
| Permafrost Lens        | 22.2 $\pm$ 90.5  | 641 (27)  | 135.6 $\pm$ 95.7 | 88 (3)  |                 |        |
| Thaw Stream            | 15.6 $\pm$ 20.5  | 202 (9)   |                  |         |                 |        |
| Permafrost Free        | 56.8 $\pm$ 21.9  | 199 (15)  | 27.4 $\pm$ 39.4  | 3 (2)   |                 |        |

Table S8. Dissolved organic carbon concentrations (DOC; mg L<sup>-1</sup>) and number of DOC measurements and number of studies they were taken from using the three main DOC analysis methods used (Combustion, Persulphate, Photometric) to determine DOC concentrations corresponding to the boxplots showing DOC concentrations found across ecosystems in Figure 3 in main text. DOC = median DOC concentration (mg L<sup>-1</sup>) ± the interquartile range. N = the number outside the parentheses represents DOC measurements and the number inside the parentheses represents the number of studies.

| Ecosystem          | Combustion   |          | Persulphate  |         | Photometric |        |
|--------------------|--------------|----------|--------------|---------|-------------|--------|
|                    | DOC          | N        | DOC          | N       | DOC         | N      |
| Yedoma             | 8.9 ± 13.1   | 107 (7)  | 19.6 ± 38.1  | 11 (2)  |             |        |
| Coastal tundra     | 46.6 ± 172.3 | 155 (8)  | 116.1 ± 94.5 | 143 (1) |             |        |
| RTS                | 14.8 ± 19.1  | 195 (9)  |              |         |             |        |
| Upland tundra      | 28.3 ± 59.4  | 523 (22) |              |         | 71.5 ± 54.5 | 10 (1) |
| Forest             | 58.9 ± 104.5 | 168 (13) | 27.4 ± 31.5  | 9 (3)   | 40.1 ± 25.3 | 21 (3) |
| Permafrost wetland | 17.6 ± 53.6  | 346 (20) | 60.9 ± 35.6  | 30 (1)  |             |        |
| Permafrost bog     | 62.5 ± 73.1  | 632 (29) | 99.9 ± 60.3  | 37 (4)  |             |        |
| Peatland           | 58.6 ± 39.1  | 38 (6)   |              |         |             |        |

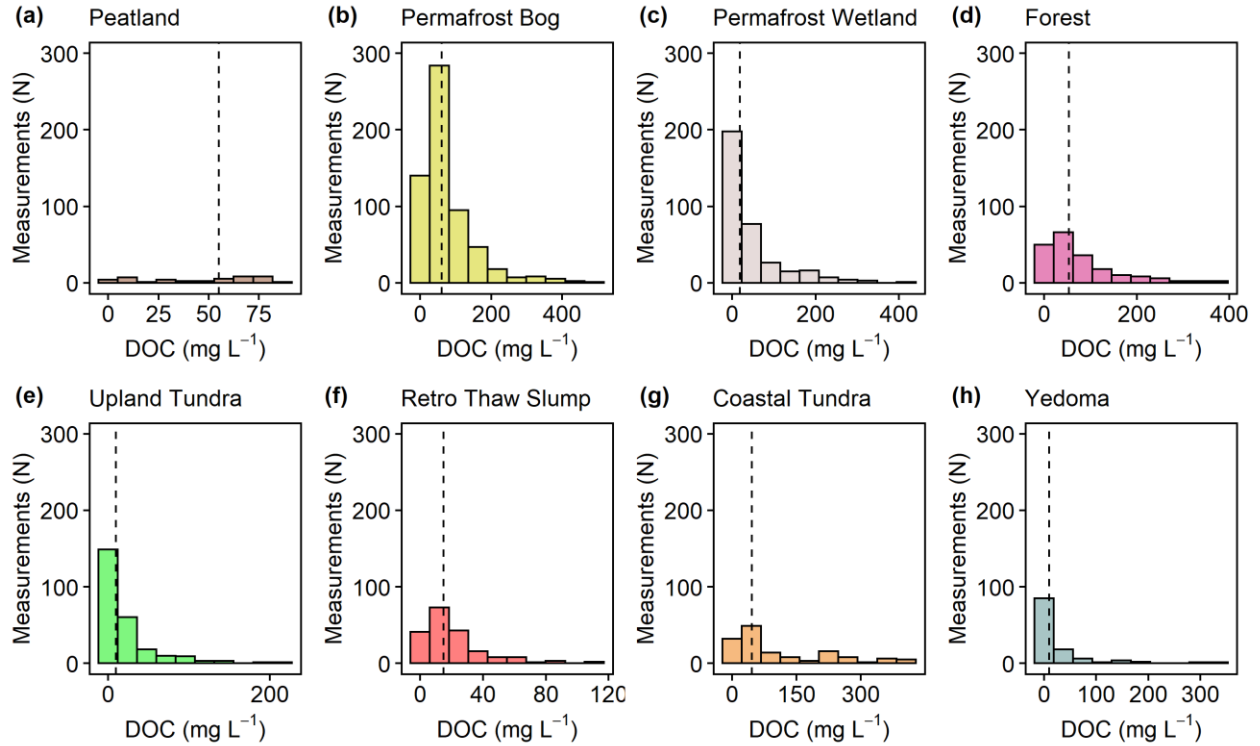

Figure S1. Histograms for the number of DOC measurements (N) at various DOC concentrations (mg L<sup>-1</sup>) included in the dataset in the top 3 m for each ecosystem type. DOC concentrations binned into 10 groups for each. (f) Retro Thaw Slump = Retrogressive thaw slump. Black dotted vertical lines in each panel represents the median DOC concentration (mg L<sup>-1</sup>) for that ecosystem. Note different scales of DOC concentrations on x-axis.

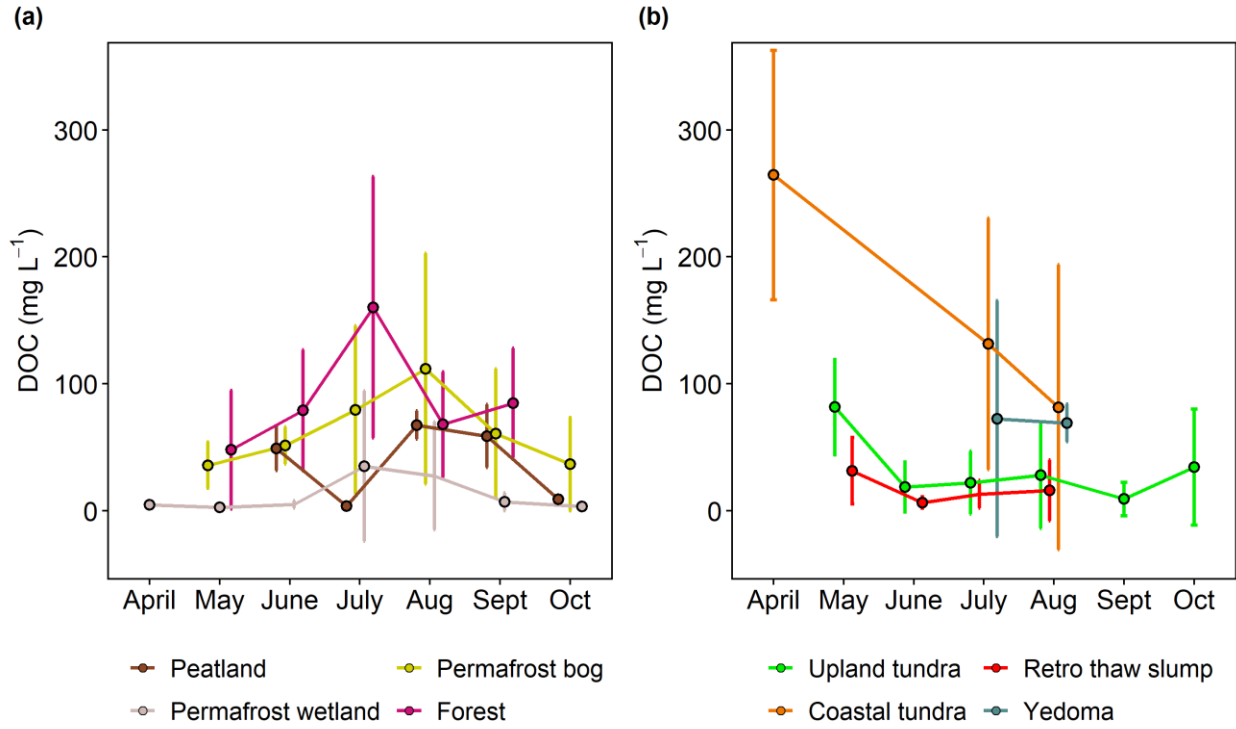

Figure S2. Seasonality in DOC concentrations ( $\text{mg L}^{-1}$ ) in the top 3 m for each ecosystem type. (a) Organic rich ecosystems. (b) Mineral soil dominated ecosystems. Error bars represent  $\pm 1$  standard deviation.

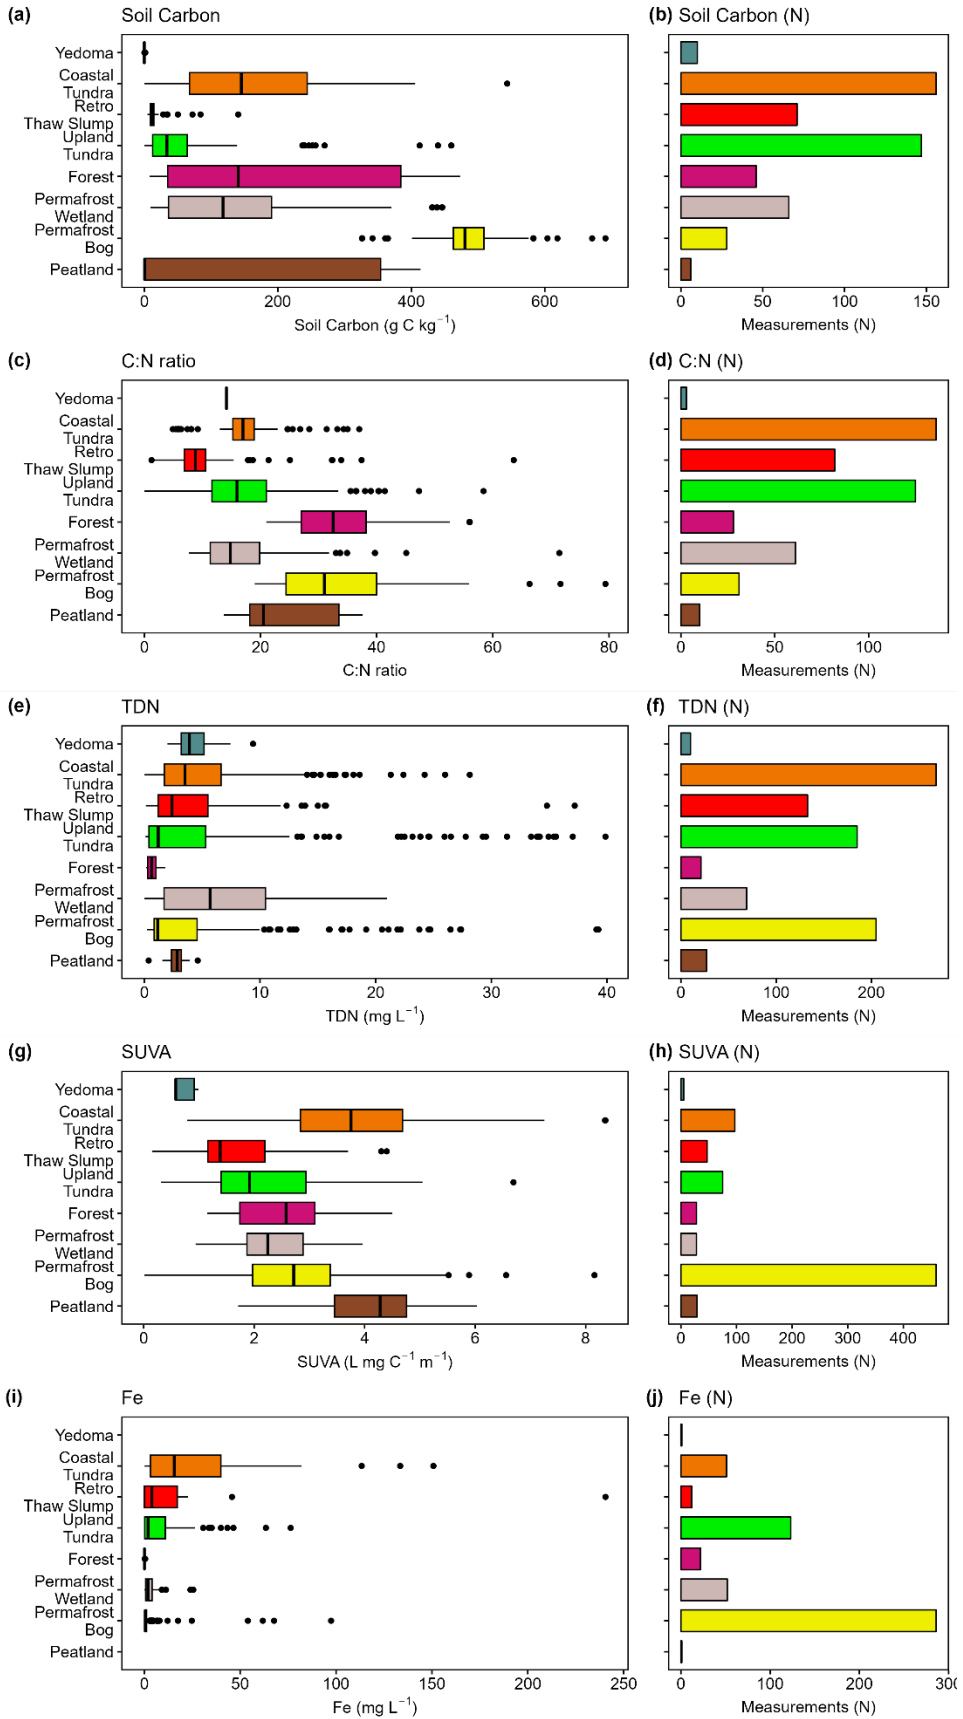

Figure S3. Boxplot of (a, c, e, g, i) continuous variables used in analysis, and bar plots of (b, d, f, h, j) the number of measurements of each continuous variable taken from the top 3 m for each ecosystem type. Boxes represents the interquartile range (25 – 75%), with median shown as black horizontal line. Whiskers extend to 1.5 times the interquartile range (distance between first and third quartile) in each direction. Soil Carbon = carbon content of soil ( $\text{g C kg}^{-1}$ ). C:N ratio = carbon:nitrogen ratio. TDN = total dissolved nitrogen ( $\text{mg L}^{-1}$ ). SUVA = the specific UV absorbance at 254 nm ( $\text{L mg C}^{-1} \text{ m}^{-1}$ ). Fe = dissolved iron ( $\text{mg L}^{-1}$ ).

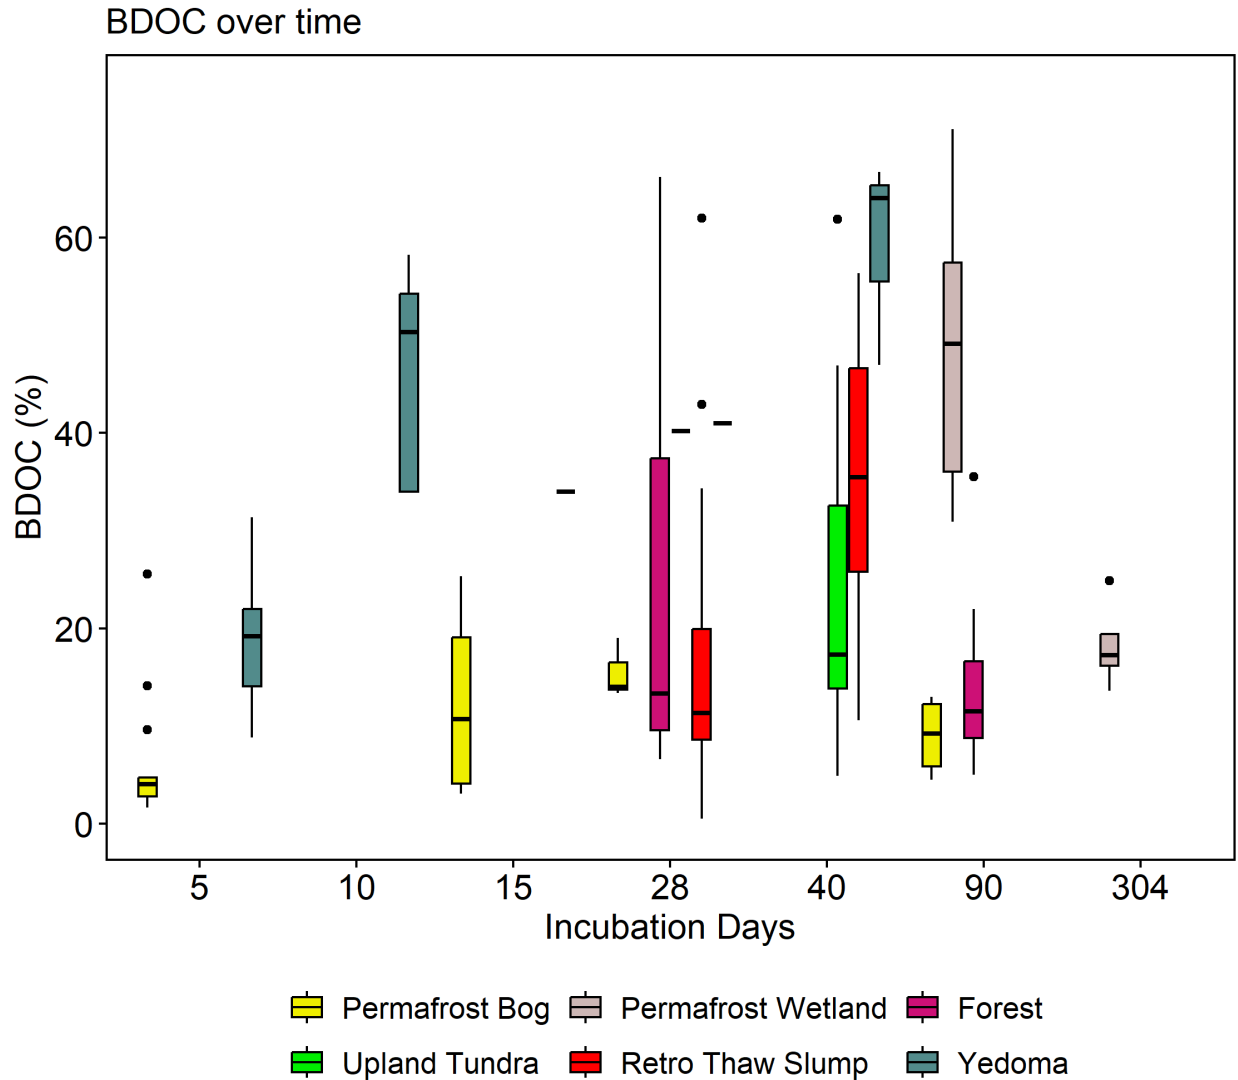

Figure S4. Change in biodegradable DOC (BDOC; %) from the top 3 m over time during incubations for each ecosystem type where data was available. BDOC loss was determined following 3 – 304 days of incubation. Time points were binned into 5, 10, 15, 28, 40, 90, and 304 incubations days for improved clarity of presentation. Data from different incubation lengths was combined due to low sample size. Retro Thaw Slump = Retrogressive Thaw Slump. Boxes represents the interquartile range (25 – 75%), with median shown as black horizontal line. Whiskers extend to 1.5 times the interquartile range (distance between first and third quartile) in each direction, with outlier data plotted individually as black dots.

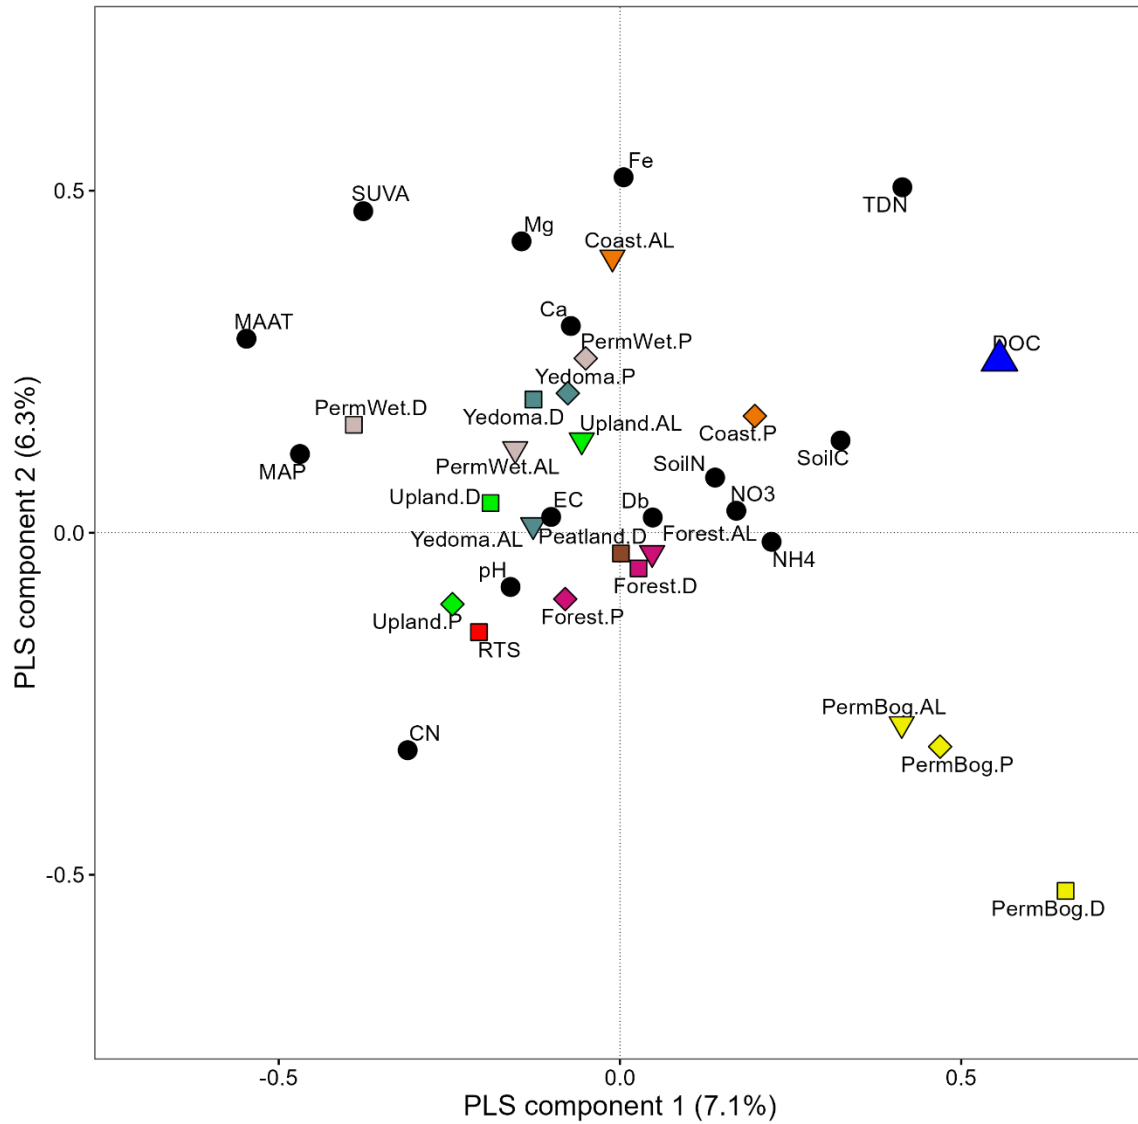

Figure S5. Partial least squares regression (PLS) with loadings plot containing all continuous and categorical variables considered when attempting to explain the variance in DOC concentrations (blue triangle). Black circles in the loadings plot represent continuous environmental data that had at least 20% coverage of DOC data. All continuous data was log transformed, mean centered, and standardized. CN = carbon:nitrogen ratio. SUVA = the specific UV absorbance at 254 nm. MAP = mean annual precipitation. MAAT = mean annual temperature. SoilC = carbon content of. TDN = total dissolved nitrogen. Fe = dissolved iron. Ca = dissolved calcium. Mg = dissolved magnesium. Db = bulk density of soil. pH = soil or pore water pH. EC = electrical conductivity of soil pore water. SoilN = soil nitrogen content. NO3 = dissolved nitrate. NH4 = dissolved ammonium. PermWet = permafrost wetland ecosystem class. Yedoma = Yedoma ecosystem class. RTS = retrogressive thaw slump ecosystem class. Coast = coastal tundra ecosystem class. PermBog = permafrost bog ecosystem class. Forest = forest ecosystem class. Upland = upland tundra ecosystem class. Peatland = peatland tundra ecosystem class. Measurements from the active layer of each ecosystem class are shown as downward pointing triangle icons and labelled ".AL" after the ecosystem label. Measurements



from the permafrost lens of each ecosystem class are shown as diamond icons and labelled “.P” after the ecosystem label. Measurements from disturbed sites of each ecosystem class are shown as square icons and labelled “.D” after the ecosystem label.
